# Supplementary material for: Comparative Functional Analysis of the Caenorhabditis elegans and Drosophila melanogaster Proteomes
Source: PLOS journal article supplement (doi:10.1371/journal.pbio.1000048), 2009-02-27
Supplement: S2 (10.1371/journal.pbio.1000048.s002) [file journal.pbio.1000048.s002]

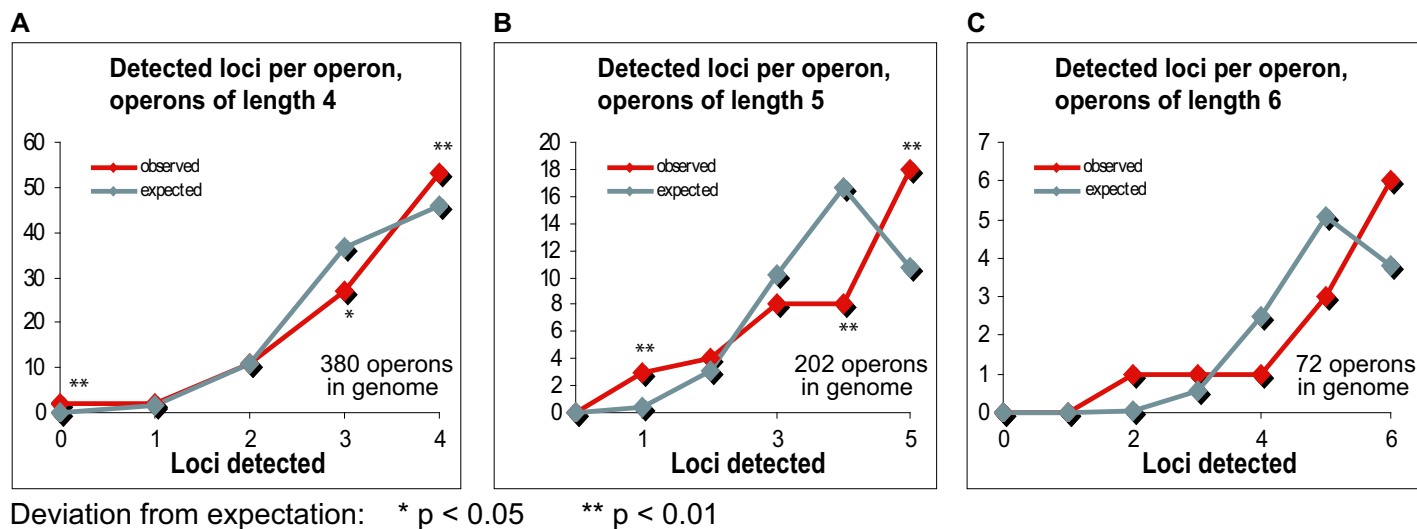

### Figure S2

Coordinated expression of operon genes. The number of detected loci per operon deviates from what would be expected under simple independence, as shown exemplary for operons of lengths 4 - 6 (A-C). A higher fraction of operons than expected is either fully expressed (all proteins detected) or hardly expressed at all (none or only few proteins detected).
