# Supplementary material for: Comparative Functional Analysis of the Caenorhabditis elegans and Drosophila melanogaster Proteomes
Source: PLOS journal article supplement (doi:10.1371/journal.pbio.1000048), 2009-02-27
Supplement: S2 (10.1371/journal.pbio.1000048.s002) [file redirect.do]

***D. melanogaster*, based on 8,393 detected out of 14,440 genes**

all p-values below 2e-16

|          | <b><i>D. melanogaster</i> protein vs. affymetrix</b>                 | <b>Median abundance (ppm)</b> |             |
|----------|----------------------------------------------------------------------|-------------------------------|-------------|
| Spearman | <b>GO (# of entries)</b>                                             | <b>Protein</b>                | <b>Affy</b> |
| 0.85     | cellular macromolecule metabolic process (18)                        | 303.7                         | 153.3       |
| 0.82     | translation (260)                                                    | 174.7                         | 142.3       |
| 0.76     | generation of precursor metabolites and energy (43)                  | 470.5                         | 345.3       |
| 0.75     | cytoskeleton organization and biogenesis (465)                       | 43.3                          | 67.7        |
| 0.73     | cell cycle (409)                                                     | 26.3                          | 62.7        |
| 0.72     | cell homeostasis (36)                                                | 229.9                         | 93.7        |
| 0.72     | ion transport (93)                                                   | 12.5                          | 36          |
| 0.69     | DNA metabolism (134)                                                 | 16.5                          | 50.4        |
| 0.69     | cellular component organization and biogenesis (693)                 | 19.2                          | 53.7        |
| 0.69     | nucleobase, nucleoside, nucleotide and nucleic acid metabolism (274) | 43.8                          | 53.9        |
| 0.68     | amino acid and derivative metabolism (101)                           | 81.2                          | 76.2        |
| 0.68     | mitochondrion organization and biogenesis (54)                       | 30.3                          | 75.3        |
| 0.67     | cellular protein metabolism (284)                                    | 19.2                          | 90.6        |
| 0.66     | transport (702)                                                      | 23                            | 53.5        |
| 0.65     | metabolism (992)                                                     | 25.5                          | 61.7        |
| 0.64     | developmental process (262)                                          | 13.6                          | 43.6        |
| 0.64     | multicellular organismal development (1022)                          | 12.9                          | 49          |
| 0.63     | multicellular organismal process (447)                               | 13.7                          | 40.9        |
| 0.62     | cell differentiation (661)                                           | 12.9                          | 49.6        |
| 0.62     | regulation of gene expression, epigenetic (69)                       | 16.9                          | 53.6        |
| 0.62     | response to abiotic stimulus (136)                                   | 15.8                          | 47.5        |
| 0.61     | cellular process (866)                                               | 19.9                          | 54.5        |
| 0.6      | lipid metabolism (110)                                               | 13.1                          | 61.7        |
| 0.6      | response to stress (239)                                             | 10                            | 46.9        |
| 0.59     | cellular metabolism (171)                                            | 14.6                          | 57.8        |
| 0.59     | organelle organization and biogenesis (318)                          | 31.9                          | 59.8        |
| 0.59     | protein modification (378)                                           | 11.7                          | 49.7        |
| 0.58     | behavior (227)                                                       | 12.4                          | 51.9        |
| 0.58     | cell death (140)                                                     | 14.5                          | 64.3        |
| 0.58     | embryonic development (300)                                          | 8.9                           | 47.3        |
| 0.58     | protein transport (117)                                              | 53.4                          | 67.3        |
| 0.57     | biological_process (343)                                             | 7                             | 26.8        |
| 0.57     | cell proliferation (125)                                             | 14.7                          | 64.2        |
| 0.57     | cellular biosynthetic process (460)                                  | 16.5                          | 46.3        |
| 0.56     | reproduction (468)                                                   | 13.5                          | 57.7        |
| 0.56     | signal transduction (431)                                            | 7.1                           | 40.6        |
| 0.56     | transcription (372)                                                  | 12.2                          | 41.9        |
| 0.53     | homeostatic process (63)                                             | 10.9                          | 49.6        |
| 0.53     | response to stimulus (86)                                            | 12.5                          | 42.1        |
| 0.52     | missing GO term (4556)                                               | 8.2                           | 34.8        |
| 0.49     | protein localization (92)                                            | 26.7                          | 54.7        |

***C. elegans*, based on 8,501 detected out of 19,336 genes**

all p-values below 2e-16

|          | <b><i>C. elegans</i> protein vs. affymetrix</b>                      | <b>Median abundance (ppm)</b> |             |
|----------|----------------------------------------------------------------------|-------------------------------|-------------|
| Spearman | <b>GO (# of entries)</b>                                             | <b>Protein</b>                | <b>Affy</b> |
| 0.91     | ribosome biogenesis (12)                                             | 34.4                          | 68.5        |
| 0.86     | translation (187)                                                    | 179.1                         | 198.5       |
| 0.8      | nucleobase, nucleoside, nucleotide and nucleic acid metabolism (247) | 44.4                          | 85          |
| 0.78     | catabolism (134)                                                     | 60.6                          | 102.7       |
| 0.76     | carbohydrate metabolism (134)                                        | 28.2                          | 91.3        |
| 0.76     | electron transport (176)                                             | 29.3                          | 60.6        |
| 0.73     | cytoskeleton organization and biogenesis (57)                        | 25.5                          | 54.6        |
| 0.73     | protein metabolism (345)                                             | 30.1                          | 70.6        |
| 0.69     | metabolism (1362)                                                    | 24.5                          | 68.9        |
| 0.68     | DNA metabolism (129)                                                 | 10.4                          | 63.6        |
| 0.67     | biosynthetic process (254)                                           | 34                            | 85.7        |
| 0.66     | amino acid and derivative metabolism (129)                           | 67                            | 82.6        |
| 0.66     | biological_process (88)                                              | 5                             | 52          |
| 0.66     | cellular component organization and biogenesis (111)                 | 51.4                          | 88.1        |
| 0.66     | organelle organization and biogenesis (79)                           | 35.1                          | 75.6        |
| 0.63     | ion transport (296)                                                  | 2.8                           | 41.9        |
| 0.63     | transport (860)                                                      | 8.7                           | 50.8        |
| 0.62     | protein transport (97)                                               | 57.5                          | 88.3        |
| 0.57     | protein modification (359)                                           | 6.2                           | 49.2        |
| 0.54     | missing GO term (5251)                                               | 8.3                           | 49.4        |
| 0.53     | transcription (322)                                                  | 4.2                           | 47.6        |
| 0.52     | signal transduction (296)                                            | 3.6                           | 34.2        |
| 0.37     | lipid metabolism (129)                                               | 8.6                           | 60          |

**Table S2**

Intra-species protein vs. transcript correlations, broken down into functional categories.

Both fly and worm proteins were mapped to GO slim categories by a similar procedure. In both organisms, comparable categories show a high or low correlation. In addition, even categories of relatively low abundance (e.g. 'DNA metabolism') can have a high correlation, indicating that the ranking is not simply based on measurement accuracy.
