# Supplementary material for: Comparative Functional Analysis of the Caenorhabditis elegans and Drosophila melanogaster Proteomes
Source: PLOS journal article supplement (doi:10.1371/journal.pbio.1000048), 2009-02-27
Supplement: S3 (10.1371/journal.pbio.1000048.s003) [file journal.pbio.1000048.s003]

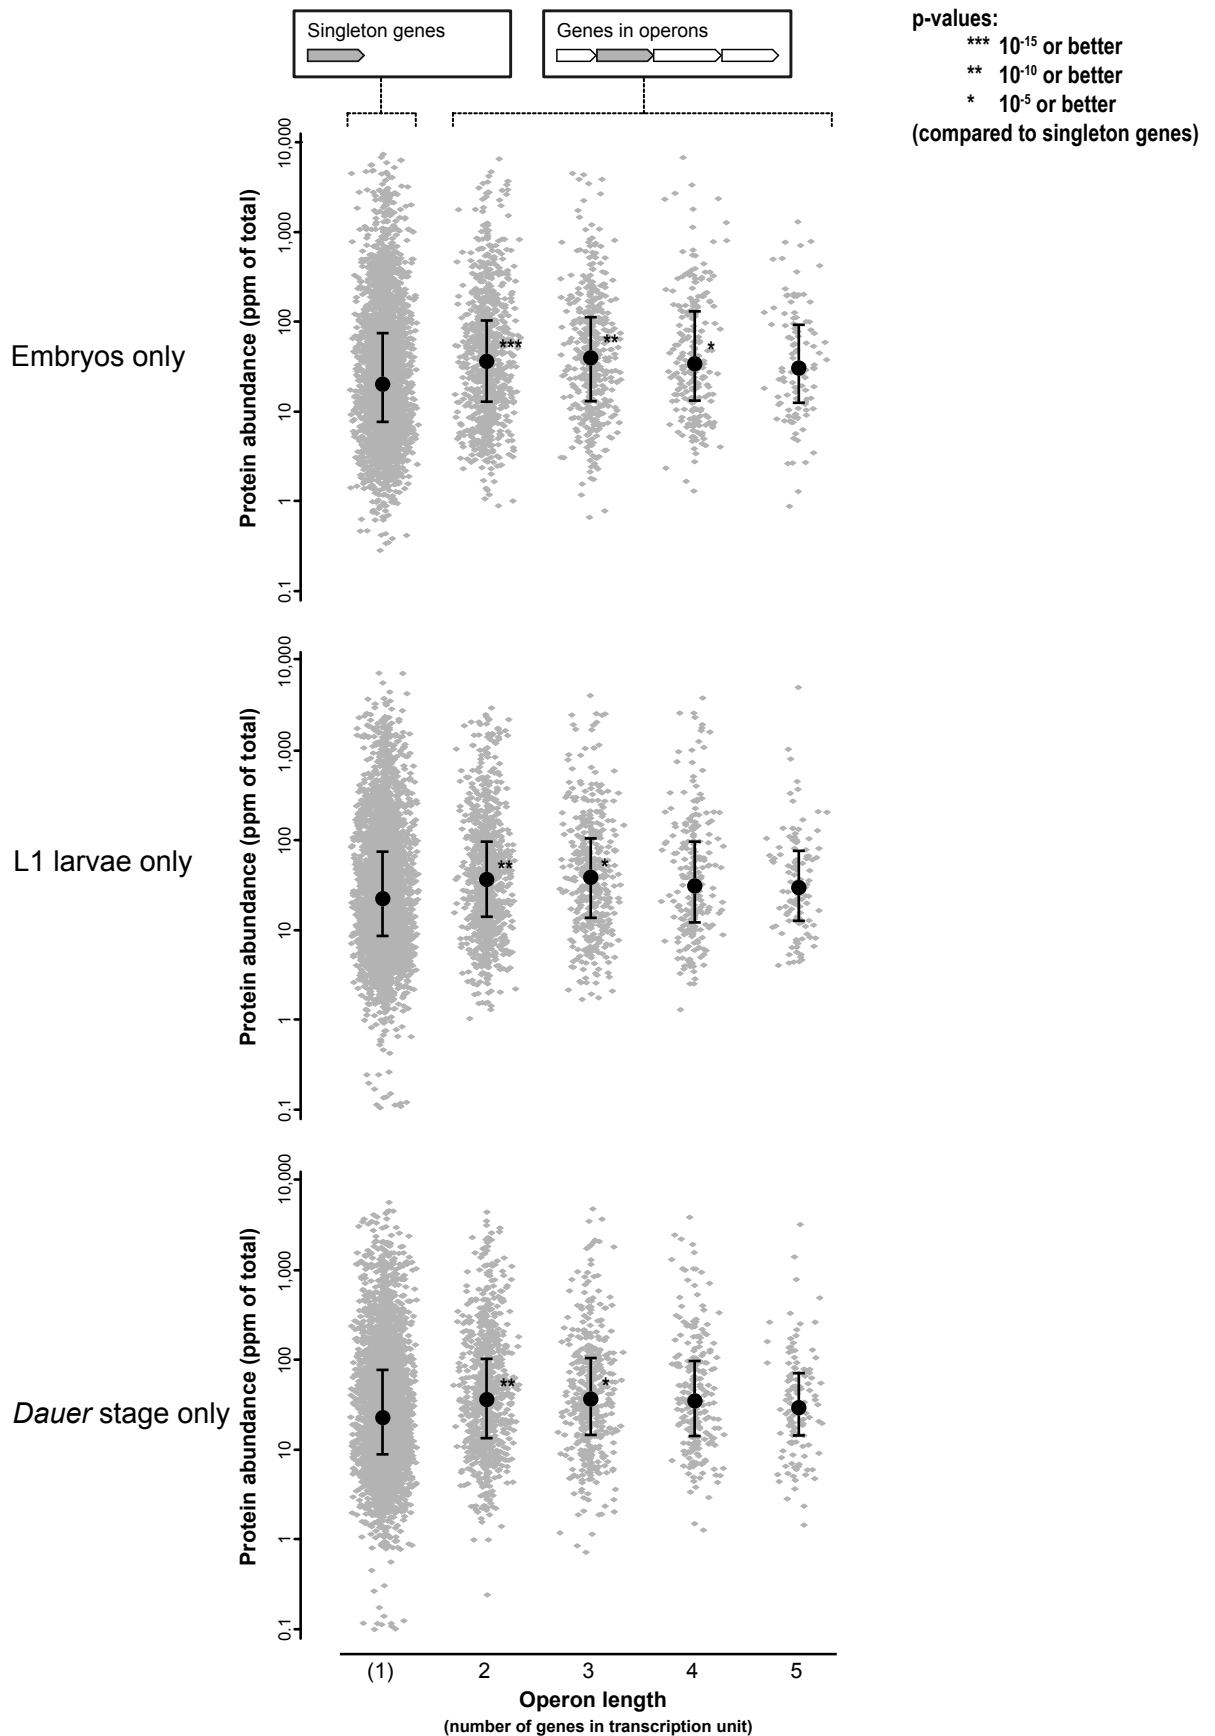

**Figure S3**

Proteins encoded by operon genes are more abundant than those of singleton genes, even when focusing exclusively on embryos, L1, and *Dauer* larvae. While clearly significant, the effect size is lower than for the whole, presumably due to undersampling (each plot represents less than 12% of the total data).
