# Supplementary material for: Comparative Functional Analysis of the Caenorhabditis elegans and Drosophila melanogaster Proteomes
Source: PLOS journal article supplement (doi:10.1371/journal.pbio.1000048), 2009-02-27
Supplement: S8 (10.1371/journal.pbio.1000048.s008) [file journal.pbio.1000048.s008]

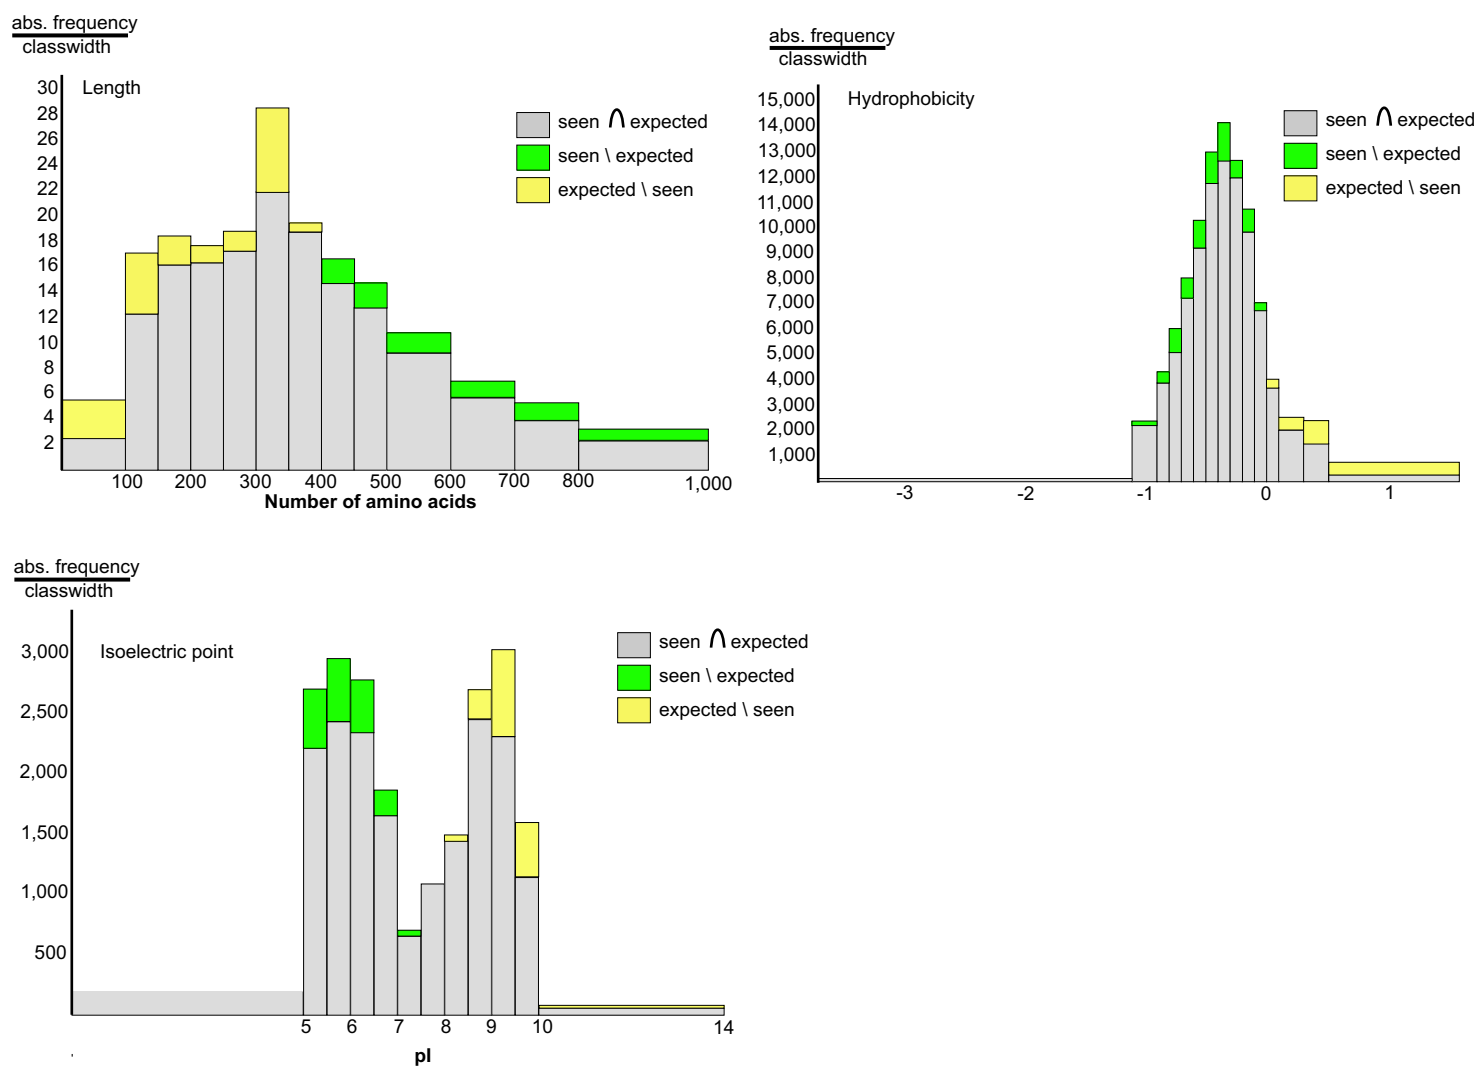

**Figure S8**  
Statistical bias analysis of the protein parameters length, pI, and hydrophobicity. Distributions of the parameters of the identified proteins vs. all proteins in WormBase (WS140). Overrepresented areas are shown in green, underrepresented areas in yellow (p-values were better than 1e-10, for details about the applied statistics see [10]).
