# Supplementary material for: Comparative Functional Analysis of the Caenorhabditis elegans and Drosophila melanogaster Proteomes
Source: PLOS journal article supplement (doi:10.1371/journal.pbio.1000048), 2009-02-27
Supplement: S9 (10.1371/journal.pbio.1000048.s009) [file redirect.do]

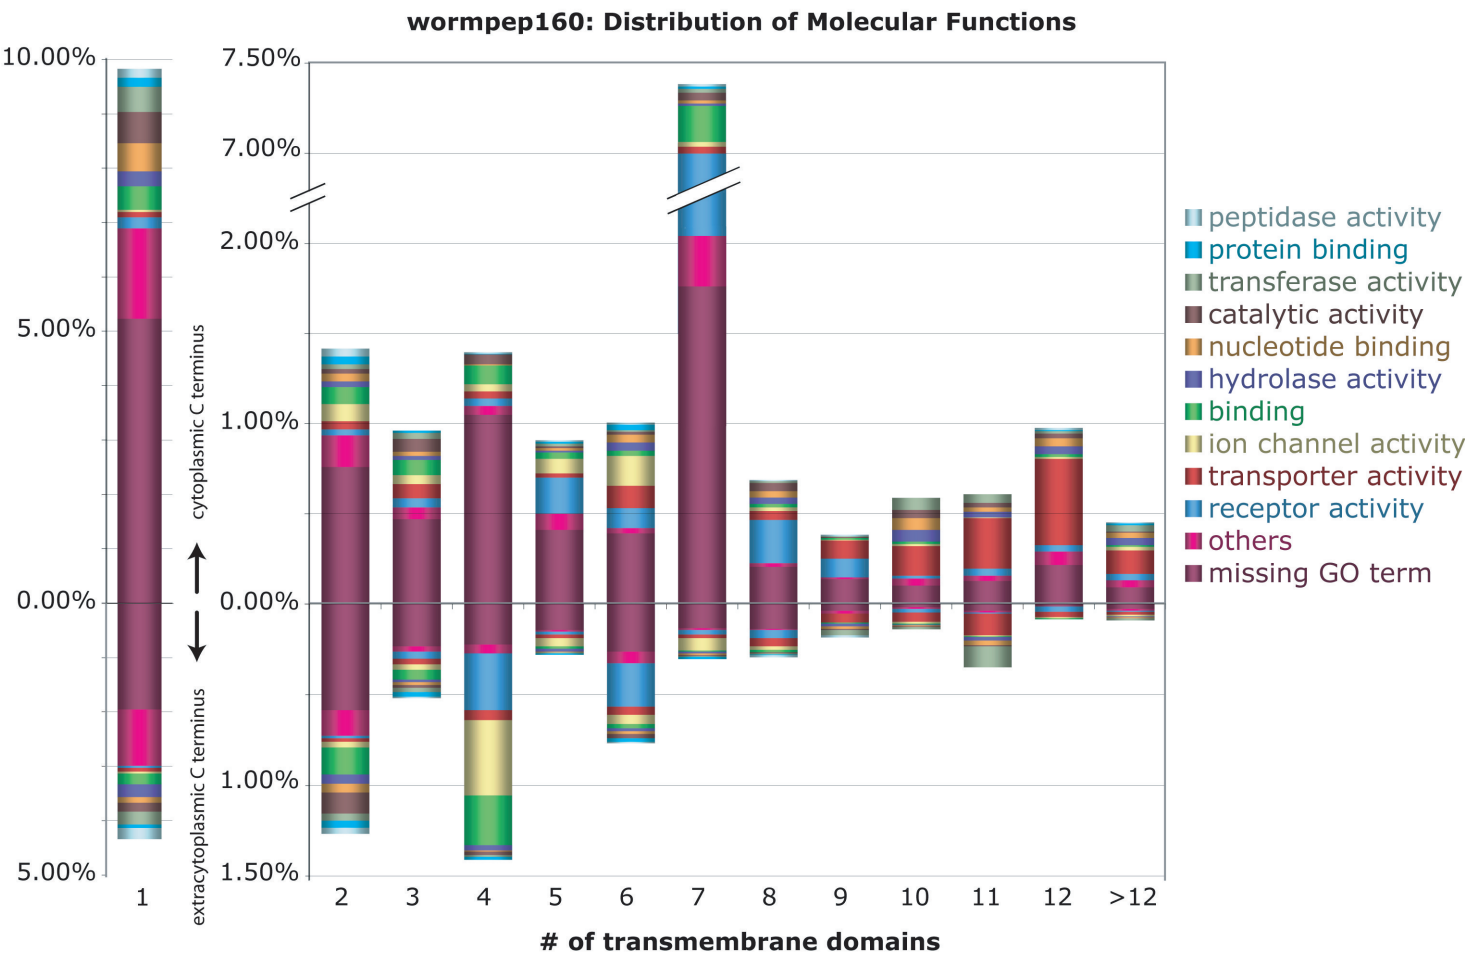

**Figure S9**  
The predicted *C. elegans* transmembrane proteome and its molecular function. We predicted the transmembrane topology of the entire *C. elegans* proteome and included the molecular function of the proteins with transmembrane helices. The percentages are referring to the entire dataset. Proteins with a cytoplasmic C-terminus were plotted upwards, proteins with an extracytoplasmic C-terminus were plotted downwards. The colour code for the molecular function is indicated.
