# Supplementary material for: Comparative Functional Analysis of the Caenorhabditis elegans and Drosophila melanogaster Proteomes
Source: PLOS journal article supplement (doi:10.1371/journal.pbio.1000048), 2009-02-27
Supplement: S10 (10.1371/journal.pbio.1000048.s010) [file journal.pbio.1000048.s010]

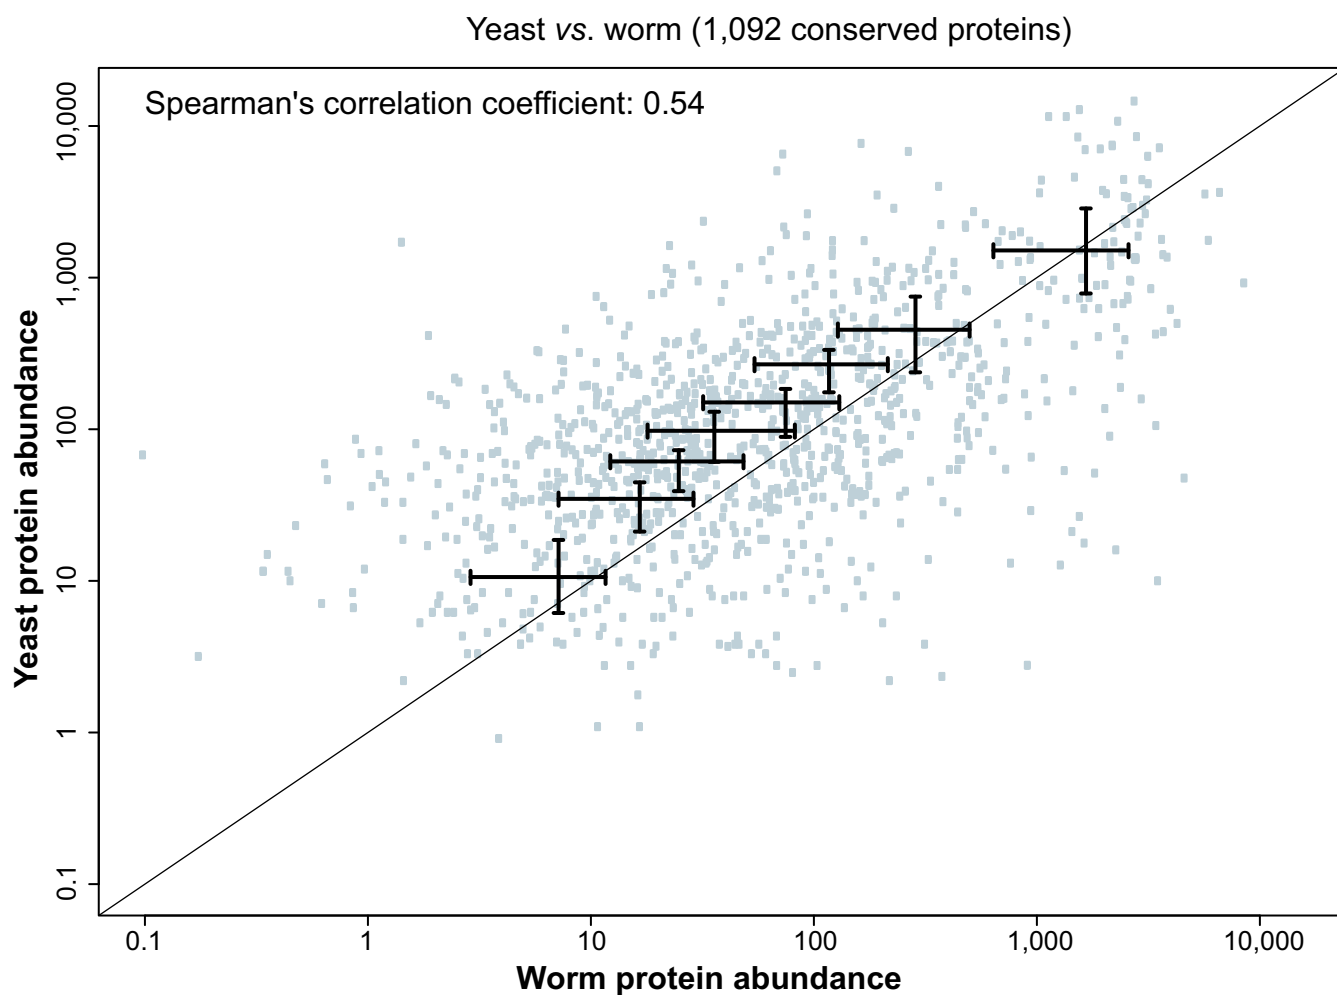

**Figure S10**

Further support for the validity of protein quantification in *C. elegans*, from comparison against published *Saccharomyces cerevisiae* data. Protein abundances deduced from spectral counting (*C. elegans*) and from protein tagging and immunodetection (yeast [41]) of 1,092 pairs of orthologs from both species yielded a correlation coefficient of  $R_S=0.54$ . Medians of equal sized bins are indicated as crosses, whiskers encompass the range from 25 to 75% of values.
